# The Influence of pCO<sub>2</sub> and Temperature on Gene Expression of Carbon and Nitrogen Pathways in *Trichodesmium* IMS101

Orly Levitan<sup>1\*</sup>, Stefanie Sudhaus<sup>2</sup>, Julie LaRoche<sup>2</sup>, Ilana Berman-Frank<sup>1</sup>

<sup>1</sup> The Mina and Everard Goodman Faculty of Life Sciences, Bar Ilan University, Ramat Gan, Israel, <sup>2</sup> Leibniz Institute of Marine Sciences at Kiel University (IFM-GEOMAR), Kiel, Germany

## Abstract

Growth, protein amount, and activity levels of metabolic pathways in *Trichodesmium* are influenced by environmental changes such as elevated pCO<sub>2</sub> and temperature. This study examines changes in the expression of essential metabolic genes in *Trichodesmium* grown under a matrix of pCO<sub>2</sub> (400 and 900 μatm) and temperature (25 and 31 °C). Using RT-qPCR, we studied 21 genes related to four metabolic functional groups: CO<sub>2</sub> concentrating mechanism (*bicA1*, *bicA2*, *ccmM*, *ccmK2*, *ccmK3*, *ndhF4*, *ndhD4*, *ndhL*, *chpX*), energy metabolism (*atpB*, *sod*, *prx*, *glcD*), nitrogen metabolism (*glnA*, *hetR*, *nifH*), and inorganic carbon fixation and photosynthesis (*rbcL*, *rca*, *psaB*, *psaC*, *psbA*). *nifH* and most photosynthetic genes exhibited relatively high abundance and their expression was influenced by both environmental parameters. A two to three orders of magnitude increase was observed for *glnA* and *hetR* only when both pCO<sub>2</sub> and temperature were elevated. CO<sub>2</sub> concentrating mechanism genes were not affected by pCO<sub>2</sub> and temperature and their expression levels were markedly lower than that of the nitrogen metabolism and photosynthetic genes. Many of the CO<sub>2</sub> concentrating mechanism genes were co-expressed throughout the day. Our results demonstrate that in *Trichodesmium*, CO<sub>2</sub> concentrating mechanism genes are constitutively expressed. Co-expression of genes from different functional groups were frequently observed during the first half of the photoperiod when oxygenic photosynthesis and N<sub>2</sub> fixation take place, pointing at the tight and complex regulation of gene expression in *Trichodesmium*. Here we provide new data linking environmental changes of pCO<sub>2</sub> and temperature to gene expression in *Trichodesmium*. Although gene expression indicates an active metabolic pathway, there is often an uncoupling between transcription and enzyme activity, such that transcript level cannot usually be directly extrapolated to metabolic activity.

**Citation:** Levitan O, Sudhaus S, LaRoche J, Berman-Frank I (2010) The Influence of pCO<sub>2</sub> and Temperature on Gene Expression of Carbon and Nitrogen Pathways in *Trichodesmium* IMS101. PLoS ONE 5(12): e15104. doi:10.1371/journal.pone.0015104

**Editor:** Geraldine Butler, University College Dublin, Ireland

**Received:** August 6, 2010; **Accepted:** October 21, 2010; **Published:** December 6, 2010

**Copyright:** © 2010 Levitan et al. This is an open-access article distributed under the terms of the Creative Commons Attribution License, which permits unrestricted use, distribution, and reproduction in any medium, provided the original author and source are credited.

**Funding:** This work was conducted as part of the BMBF-MOST grant No. 1950 to IBF and JLR. O. Levitan was supported by a Reiger Fellowship for Environmental Studies and by the Eshkol scholarship from the Israeli Ministry of Science. *Trichodesmium* genome published on the Joint Genome Institute (JGI) website ([http://genome.jgi-psf.org/finished\\_microbes/trier/trier.home.html](http://genome.jgi-psf.org/finished_microbes/trier/trier.home.html)), conducted by the U.S. Department of Energy Joint Genome Institute is supported by the Office of Science of the U.S. Department of Energy under Contract No. DE-AC02-05CH11231. The funders had no role in study design, data collection and analysis, decision to publish, or preparation of the manuscript.

**Competing Interests:** The authors have declared that no competing interests exist.

\* E-mail: levitao@gmail.com

## Introduction

The marine filamentous N<sub>2</sub> fixing (diazotroph) cyanobacteria *Trichodesmium* spp. form extensive blooms contributing 25 to 50% of the estimated rates of N<sub>2</sub> fixation in the oligotrophic subtropical and tropical oceans [1]. *Trichodesmium*'s dominant role in carbon and nitrogen cycling has prompted investigations examining the effects of rising sea surface temperatures and elevated atmospheric pCO<sub>2</sub> (leading to ocean acidification) on the growth and abundance of this organism.

Elevated pCO<sub>2</sub> supports enhanced N<sub>2</sub> fixation and growth rates in *Trichodesmium* [2–7]. These trends are further accentuated when elevated pCO<sub>2</sub> and higher temperatures are combined [3,5]. The higher N<sub>2</sub> fixation and growth rates are enabled via flexible phosphorus stoichiometry, changes in the activity of the CO<sub>2</sub> concentrating mechanism (CCM), and modified protein activity [4–8].

In *Trichodesmium*, as in other cyanobacteria, metabolic pathways (e.g. respiration, photosynthesis, C<sub>i</sub> fixation, N<sub>2</sub> fixation, and

combined nitrogen assimilation) share cellular complexes such as plastoquinone (PQ) pool, succinate dehydrogenase and ferredoxin [9–11]. *Trichodesmium*'s unique metabolism allows oxygenic photosynthesis and oxygen-sensitive N<sub>2</sub> fixation to occur concurrently during the photoperiod via a complex spatial-temporal separation of these processes [11–15]. Photosynthetic activity in *Trichodesmium* is coupled with CCM activity. PSII driven electron transport is responsible for generating energy needed to pump HCO<sub>3</sub><sup>-</sup> into the cell. This HCO<sub>3</sub><sup>-</sup> is subsequently converted to CO<sub>2</sub> to be used by the ribulose-1,5-bisphosphate carboxylase oxygenase (RubisCO) within the carboxysomes [6]. Regulation of the photosynthetic and N<sub>2</sub> fixation processes occurs at the transcription, translation, and post-translational (activity) levels [5,8,10,12,13,16,17]. While elevated pCO<sub>2</sub> and temperature resulted in higher growth rates, higher N<sub>2</sub> fixation rates, and higher C:P ratios, photosynthesis, protein pools, and total cellular allocation of carbon and nitrogen were not significantly affected [5]. Importantly, the abundance of nitrogenase and glutamine synthetase (mediating combined nitrogen assimilation) did not

increase in parallel to the increased N<sub>2</sub> fixation rates, implying that environmental factors can allow higher reaction turnover rates through the same protein amounts [5,8]. In addition, our previous study showed that pCO<sub>2</sub> changed the mRNA diel expression patterns, but not the abundance, of five genes (*nifH*, *glnA*, *hetR*, *psbA*, and *psaB*), resulting in a more synchronized expression pattern under elevated pCO<sub>2</sub> [5]. We therefore decided to check the combined effect of pCO<sub>2</sub> and temperature on the expression levels of 21 genes of interest (GOI) representing key metabolic aspects in *Trichodesmium*, as part of *Trichodesmium*'s acclimation response.

Genomic analyses demonstrate that *Trichodesmium* (IMS101) has a partial suite of CCM components ([18,19]; [http://genome.jgi-psf.org/finished\\_microbes/trier/trier.home.html](http://genome.jgi-psf.org/finished_microbes/trier/trier.home.html)). Accordingly, *Trichodesmium* possesses β-carboxysomes, a cellular compartment containing RubisCO, and a low-affinity, high-flux HCO<sub>3</sub><sup>-</sup> uptake system called BicA [18–20]. *Trichodesmium* also has a specialized NADPH dehydrogenase, NDH-I<sub>4</sub>, which acts as a low-affinity CO<sub>2</sub> uptake system, converting CO<sub>2</sub> to HCO<sub>3</sub><sup>-</sup> using the ChpX protein [18]. The presence of a true internal carbonic anhydrase (CA) was not found in the genome and direct measurements by means of <sup>18</sup>O<sub>2</sub> exchange method [21] revealed only a low activity, close to the detection limit of the method [6]. Yet, there is a distinct possibility that the N-terminal domain of the essential β-carboxysomal *comM* gene found in *Trichodesmium* can act as a γ-CA in an oxidized β-carboxysome interior as was observed in *Thermosynechococcus elongatus* [19,22,23].

Currently, there is no genetic system for *Trichodesmium* transformations, limiting the physiological study of CCM activity to the examinations of fluxes of inorganic carbon (Ci) and O<sub>2</sub> [6]. Here we present the expression and abundance of genes related to CCM (*bicA1*, *bicA2*, *comM*, *comK2*, *comK3*, *ndhF4*, *ndhD4*, *ndhL* and *chpX*), energy metabolism (*atpB*, *sod*, *prx*, *glcD*), nitrogen metabolism (*glnA*, *hetR*, *nifH*), and photosynthesis and Ci fixation (*rbcL*, *rca*, *psaB*, *psaC*, *psbA*) in *Trichodesmium* acclimated to a matrix of pCO<sub>2</sub> (400 and 900 μatm) and temperature (25 and 31°C). Since diurnal regulation is essential for metabolic functions in *Trichodesmium*, we performed our measurements over the day and sampled 1, 5, 9 and 13 h after the onset of light. The sampling times were chosen for time periods that represent different metabolic preferences in *Trichodesmium* [13]: time of maximal photosynthesis (1 h), maximal N<sub>2</sub> fixation rates (5 h), late afternoon (9 h) and 1 h after dark induction (13 h). We compare the expression levels and patterns of these genes and look at the correlation of their coordinated expression.

## Materials and Methods

### Culturing and growth

*Trichodesmium* IMS101 stock cultures were grown in YBCII medium [24] at 25°C, 12: 12 light/dark cycle at ~80 μmol photons m<sup>-2</sup> s<sup>-1</sup> white light and 400 μatm pCO<sub>2</sub>. Diluted batch cultures were grown in sterile square 1 L Nalgene bottles as single filaments with gentle bubbling, sufficient for preventing aggregates formation without harming the integrity of the filaments. Stock cultures were unialgal and under exponential growth the bacterial biomass was negligible and was not observed under light microscopy or by DAPI staining. Experimental cultures were enriched with CO<sub>2</sub> and air mixes of 400 μatm (current) pCO<sub>2</sub> and 900 μatm (expected 2100) and were gradually acclimated to 31°C (1°C increase per week). Cultures were acclimated for at least 1.5–2 months before sampling. Biomass was kept under 0.2 μg chl *a* ml<sup>-1</sup>, thereby maintaining a low enough biomass that did not additionally influence the carbonate chemistry of the experimental

setup. For more information about carbonate chemistry in similar experimental setups, see Kranz et al. [6].

### Sample collection for RNA, RNA-Extraction and reverse transcription RT-qPCR

Samples of *Trichodesmium* IMS101 were collected at 4 time points during the diurnal cycle, 1, 5, 9 and 13 h after the onset of light (the last point is 1 h after dark induction). Acclimated cultures were filtered on polycarbonate filters of 1 μm pore size; 25 mm diameter filters (Osmonics). Filters were placed in sterile DNase and RNase free centrifuge tubes and put directly into liquid nitrogen until transfer to -80°C for storage.

mRNA was extracted with the RNeasy Plant Mini Kit (Qiagen Cat.74904) according to the producers instructions. Additionally a DNase treatment was accomplished with RNase-Free DNase Set (Qiagen Cat.79254) on column during the extraction as well as with TURBO DNA free (Ambion Cat.AM1907) after the extraction, following the manufacturer's specifications for rigorous DNase treatment to remove any gDNA contamination. RNA concentration was measured with a NanoDrop ND-1000 Spectrophotometer (peqLab Biotechnologie) and quality was tested with 1% agarose gels. Reverse transcription was conducted with the QuantiTect Reverse Transcription Kit (Qiagen Cat.205311) according to the kit's manual. Each cDNA reaction contained 100 ng template RNA and was stored at -20°C until further utilization. RT-qPCR was carried out with Platinum SYBR Green qPCR SuperMix-UDG with ROX (Invitrogen Cat.11744-500) on an ABI PRISM 7000 Sequence Detection System. All three biological replicates of each sample (acclimation and time point) were measured in duplicate 25 μl reactions. The reaction mixture contained 5 μl diluted cDNA (equivalent to approx. 2 ng RNA), 12.5 μl SYBRgreen, 0.5 μl per primer (10 pmol μl<sup>-1</sup>) and 6.5 μl PCR water. Non-Template-Controls (NTC's) and samples with the cleaned RNA as template were run to exclude contaminations with gDNA. All NTC's and all RNA samples were below the detection limit. Cycling conditions were: 50°C for 2 min, 95°C for 2 min, 40 cycles of 95°C for 15 sec, and 60°C for 30 sec, followed by a dissociation stage of 95°C for 15 sec, 60°C for 20 sec, and 95°C for 15 sec. Primers for target genes were designed using Primer Express Software v2.0 (Applied Biosystems) and are presented, by name and function, in Table 1.

The RT-qPCR results were checked for inaccurate reactions. Single measurements with deficient primer characteristics and with bad primer efficiencies according to the LinRegPCR software were removed prior to calculations [25]. Results were reported using the comparative C<sub>T</sub> method (2<sup>-ΔΔC<sub>T</sub></sup> method) which calculates the relative changes in gene expression determined from RT-qPCR experiments, according to [26]. We chose this relative quantification method as we compare not only different conditions but also results from a time course. To check if the efficiencies of the different primer pairs allow the usage of this method, we compared the mean efficiencies of all primer pairs. According to Schmittgen and Livak [27] a rough guide is that the efficiencies should be within 10% of each other. This provides us with a frame of values between 1.8 and 2.2. Our primers were within this range, with exceptions for *atpB*, *hetR* and *glnA* that yielded values of 1.6. We decided to include them into our calculations as the trends are still valid. The comparative C<sub>T</sub> method examines the threshold cycle (C<sub>t</sub>) and indicates the fractional cycle number at which the amount of amplified target reaches a fixed threshold [26]. The C<sub>t</sub> values of the gene of interest (GOI) are normalized first to the 16S rRNA gene which is used here as the endogenous reference gene for each time point. This results in ΔC<sub>t</sub> values which are equal to the differences in

**Table 1.** Description and sequences of forward and reverse primers for our target genes.

| Gene         | Description                                            | Forward Primer (5' to 3')    | Reverse Primer (5' to 3') |
|--------------|--------------------------------------------------------|------------------------------|---------------------------|
| <i>16s</i>   | 16s rRNA                                               | GCGCAACCCCTCGTCTTAGTT        | TTGTACCAGGCGAGTCTCTTCA    |
| <i>rnpB</i>  | RNaseP                                                 | TGGTAACAGGCATCCCAGATAGATA    | CGGGTCTGTCTCTCAACTCAA     |
| <i>bicA1</i> | Low affinity HCO <sub>3</sub> <sup>-</sup> transporter | GTCCTGCTGCTGGCTTATATGG       | AACAGTGTGCAAAACAAACCC     |
| <i>bicA2</i> | Low affinity HCO <sub>3</sub> <sup>-</sup> transporter | TGTCATGCTCGGCGGAAT           | TCCTAGCTGAAGAACCCCAAAA    |
| <i>ccmM</i>  | β-Carboxysome shell/gamma CA                           | TCGGCTTTCGTTCTACAGTTTTTAA    | AACTATACATCCTTACCAATGCG   |
| <i>ccmK2</i> | β-Carboxysome shell                                    | CCGAGGAGATGTTTCGGAAGTAC      | CCACCATCAACTCTTTAGCTGACTC |
| <i>ccmK3</i> | β-Carboxysome shell                                    | TGCCGGAATTGCAGCAGTA          | GCCACAACATTCTCGTGAGGA     |
| <i>ndhF4</i> | NADPH dehydrogenase - NDH-1 <sub>4</sub> complex       | TGCTAGATGAAGCGATGGAA         | CCACCACAGTGTTCGCAAA       |
| <i>ndhD4</i> | NADPH dehydrogenase - NDH-1 <sub>4</sub> complex       | TTGCGAGGTCTATTAACCCAGAA      | CCTAAAATCATGAGACTGCCAAC   |
| <i>ndhL</i>  | NADPH dehydrogenase - NDH-1 <sub>4</sub> complex       | CCTAGACACAAACCTAATCATCTCG    | GGCATAAACTATGGCTGGCATT    |
| <i>chpX</i>  | NADPH dehydrogenase - NDH-1 <sub>4</sub> complex       | TTTGTAACAACGGCAGCAGT         | CCAACCTTCGAAATAGGCTTGA    |
| <i>atpB</i>  | ATP synthase - β subunit                               | CAAGATGTATCCGTGACCTGTGAA     | TTGGTATCCCCTAGAAGTGTGT    |
| <i>sod</i>   | Superoxide-Dismutase                                   | TGTTTTGGGAAATTATGGCTCC       | AGCTATTTTCTCCTCAGTTTACCC  |
| <i>glcD</i>  | Glycolate oxidase                                      | CCCGACCCTCCAGTCAAA           | TTTCAGCAATATCCCAACCAAT    |
| <i>prx</i>   | 1-Cys peroxidoredoxin                                  | TGACAAGCGTGGAGTCAAAGTC       | GATTCTGCGTCATCTACTTAGGG   |
| <i>glnA</i>  | Glutamine synthetase                                   | AATTTGGAAGACGGAGAGCC         | AAATTAGCATAACCATCACCCAG   |
| <i>hetR</i>  | Key regulatory gene in heterocyst differentiation      | TTATAATAGTTGAAGATACAGCTCGC   | CCAGTCTTCATTAACCGGAAA     |
| <i>nifH</i>  | Fe-protein of nitrogenase                              | TGGCCGTGGTATTACTGCTATC       | GCAAATCCACCGCAAACAAC      |
| <i>rbcL</i>  | RubisCO Large subunit                                  | ACTGCCCTACCTGTGAAGAAA        | CTCCTTAGAAAAATCTGCACGC    |
| <i>rca</i>   | RubisCO activase Small subunit                         | GCTTTATTATAATGACTTAGATGCAGGT | ACCCCATCAAAATCTACCAGC     |
| <i>psaB</i>  | Subunit of PSI                                         | TCGGATCTGGTATGGAATTGC        | CCATCGTGGGTTTCAAAGTCAT    |
| <i>psaC</i>  | Subunit of PSI                                         | TGAGACTGCTTCCCTACTGAC        | TCAGCACCCAGATAAACCCG      |
| <i>psbA</i>  | Subunit of PSII (D1)                                   | CAGCGGTCCGTAATCAAT           | CATTCTAAGTTAGCGCGGTTAA    |

doi:10.1371/journal.pone.0015104.t001

thresholds for the GOI and the endogenous reference gene [26]. In time course experiments, the gene expression is often compared internally by normalization to a calibrator, which can be the time zero point. Here we have chosen the average  $\Delta Ct$  values of the *nifH* from the 400  $\mu\text{atm}/25^\circ\text{C}$  treatments (our control treatment, already normalized to 16S rRNA) as a calibrator, since we wanted to compare the relative abundance of the different genes, as well as their time dependence. The expression of this gene was relatively constant over the day.

The *rnpB* gene, encoding RNase P, was examined as a potential endogenous reference gene and revealed unexpected large variations in its expression. Therefore we decided to use 16S rRNA for further calculations, as its expression was stable under all the different conditions. Following Bustin et al. [28], standard deviations were chosen to present statistical differences between independent replicates of mRNA transcript enrichments.

### Statistical analysis and presentation

mRNA abundances of all 21 GOIs are presented in Figure 1 as the average mRNA abundance from all acclimations at each time point,  $n = 12-13$ .

To examine the influence of sampling time and the applied environmental factors, pCO<sub>2</sub> and temperature, we performed a 3-Way ANOVA (time, pCO<sub>2</sub> and temperature,  $p < 0.05$ ) for the enrichment values of each GOI over the time course measured. Number of independent replicates was  $n = 24-25$  for each temperature,  $n = 23-25$  for each pCO<sub>2</sub> concentrations, and  $n = 12-13$  for each measuring time point (Figure 2 and Table 2).

Pearson correlations for the enrichment values of our 21 GOIs were done for each sampling point,  $n = 11-13$ . Correlations in which the Pearson correlation coefficient-  $r > 0.75$  are presented by color coding in Figure 3 (CCM-pink, energy metabolism-yellow, nitrogen metabolism-blue, Ci fixation and photosynthesis-green). All correlation coefficients and significances according to the Pearson correlation are supplied in the supplemental data (Table S1 i-iv).

### Results and Discussion

We examined the expression levels of 21 GOIs over the day and under different pCO<sub>2</sub> concentrations (400 and 900  $\mu\text{atm}$ ) and temperatures (25 and 31°C). The samples for the RT-qPCR analysis were taken from the exact experimental set-up described in Levitan et al. [8]. The physiological characteristics of *Trichodesmium* IMS101 cultures used in these experiments are summarized in Table 3: growth rates ( $\text{chl d}^{-1}$ ), elemental stoichiometry [C:N, C:P, N:P (mol:mol)], nitrogen fixation rates ( $\text{nmol N}_2 \text{ chl}^{-1} \text{ h}^{-1}$ ), and NifH amounts ( $\text{pmol } \mu\text{g protein}^{-1}$ ). These data were presented and discussed in Levitan et al. [8].

The GOIs can be divided to 4 functional groups: CCM (*bicA1*, *bicA2*, *ccmM*, *ccmK2*, *ccmK3*, *ndhF4*, *ndhD4*, *ndhL*, *chpX*), energy metabolism (*atpB*, *sod*, *prx*, *glcD*), nitrogen metabolism (*glnA*, *hetR*, *nifH*), and photosynthesis and Ci fixation (*rbcL*, *rca*, *psaB*, *psaC*, *psbA*). The gene description and the primers sequences are presented in Table 1.

### Expression levels of the selected GOIs

We examined the mean enrichment levels of the different GOIs over the day, arranged by their metabolic function, using the

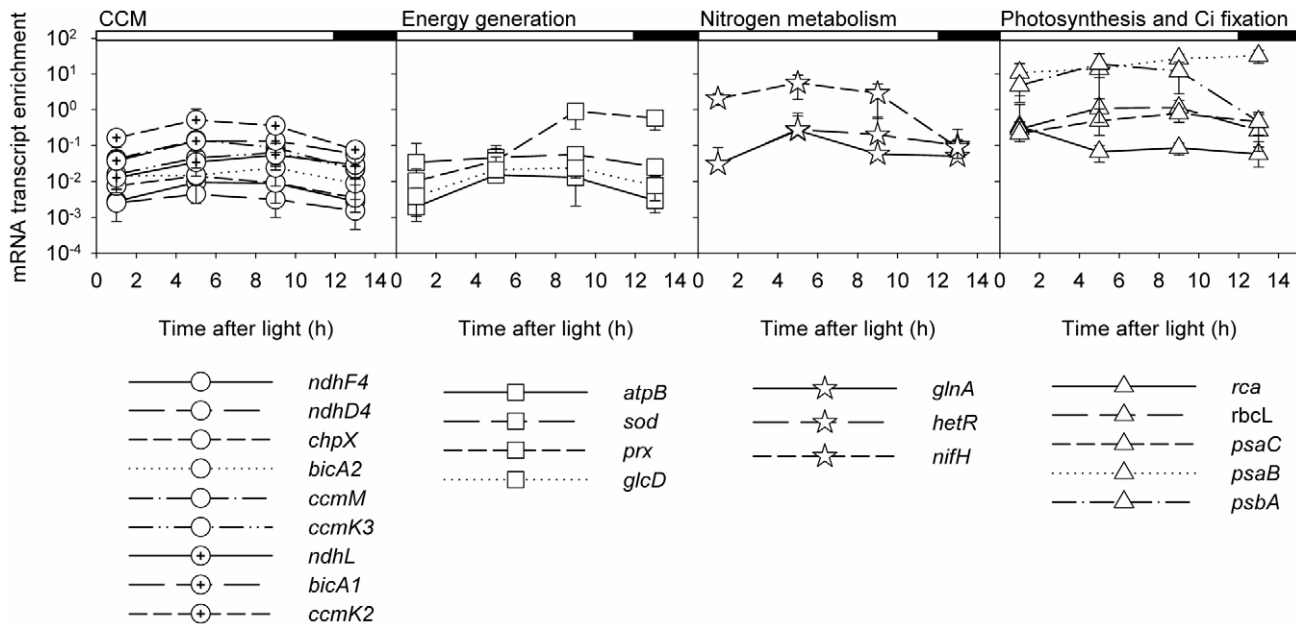

**Figure 1. mRNA transcript enrichment of 21 GOIs from *Trichodesmium* IMS101.** Culture were grown under an acclimation matrix of pCO<sub>2</sub> (400 and 900 μatm) and temperature (25 and 31°C). The curves are an average of the gene expression levels under all four acclimations. The genes are arranged on the same y-axis scale from left to right, according to their functions: CCM (circles), Energy generation (rectangles), nitrogen metabolism (stars) and photosynthetic and Ci fixation (triangles). Relative abundance estimated according to the 2<sup>-ΔΔCt</sup> method, with 16S rRNA as the endogenous reference gene, and average ΔCt values of the *nifH* from the 400 μatm/25°C treatments (control) as a calibrator. White and black bars on top of the graphs represent light and dark hours, respectively. n = 11–13 for each time point. Errors are ±1 standard deviation, following Bustin et al. (2009). Note that the results and standard deviations are presented using logarithmic scale y axes. doi:10.1371/journal.pone.0015104.g001

average enrichment values of all acclimations (Figure 1). The expression levels of each of our GOIs were on the same order of magnitude for all acclimations (excluding the high pCO<sub>2</sub>/high temperature acclimation for *hetR* and *glnA*; Figure 1).

The transcript abundance of the CCM and energy metabolism GOIs were low compared to the nitrogen metabolism and Ci fixation and photosynthetic genes. The CCM and energy metabolism genes spanned over 2 orders of magnitude, with the exception of *ccmK2* and *prx* (Figure 1). The *prx* gene, encoding for the cyanobacterial peroxiredoxin 1-Cys revealed a unique diurnal trend and had higher transcript abundance relative to the other genes examined for energy metabolism (Figure 1). The *ccmK2* gene is encoding for the main β-Carboxysome shell protein. The pores in the CcmK2 protein hexamers may enable diffusion of small essential metabolites into the carboxysome lumen [23]. The *ccmK2* gene revealed a trend similar to the other CCM genes, yet its expression was slightly higher (Figure 1). Most GOIs related to nitrogen metabolism (*glnA*, *hetR* and *nifH*) and photosynthesis and Ci fixation (*rbcL*, *rca*, *psaB*, *psaC*, *psbA*), exhibited 1–4 orders of magnitude higher average enrichment levels than the CCM and energy metabolism genes with varying expression patterns (Figure 1). Our findings correspond with results published from a community gene expression of a *Trichodesmium* spp. bloom in the Southwest Pacific Ocean showing that during the day, the highest abundance of *Trichodesmium* related genes was that of the photosynthetic and nitrogen metabolism pathways [29].

We previously showed the pCO<sub>2</sub> influences gene expression patterns over the diurnal cycle for five of the above GOIs, *nifH*, *hetR*, *glnA*, *psaB* and *psbA*, in *Trichodesmium* IMS101 (data from another set of experiments, [5]). Three of these genes, *nifH*, *psaB* and *psbA*, had similar enrichment levels in both studies (Figure 1, [5]). The combination of elevated temperature and high pCO<sub>2</sub>,

(not examined in [5]) significantly increased the transcript abundance of *glnA* and *hetR*. This acclimation resulted in ~2 orders of magnitude higher transcript levels than previously reported for *glnA* (Figure 2, [5]). The increase in *glnA* transcript abundance was not reflected in the GlnA protein pool size, and there was no significant difference for the GlnA amount between treatments and over the diurnal cycle (as measured by a quantitative western blot, one way ANOVA, p<0.05; Table 3; [5]). The combined influence of elevated pCO<sub>2</sub> and high temperature increased the average *hetR* enrichment levels to levels similar to those previously reported [5]. In *Trichodesmium*, the *hetR* gene was suggested to be constitutively expressed (under a 12:12 Light/Dark cycle), yet its diurnal abundance ranged 3–10 fold and was regulated by combined nitrogen concentration levels [30]. Based on our results, we believe that the sensitivity of *hetR* to changes in pCO<sub>2</sub>, temperature and time, further points to an environmental sensitivity of this gene.

### The influence of CO<sub>2</sub> and temperature on the selected GOIs

To determine whether the diurnal cycle interacted with the applied environmental factors to influence the transcript abundance of the GOIs, we applied a 3-Way ANOVA (pCO<sub>2</sub>, temperature and time of day) for all the GOIs tested. The results are summarized in Table 2 and the enrichment levels of the influenced genes for all acclimations are presented in Figure 2. Out of 21 GOIs, six genes (*bicA1*, *ccmM*, *ccmK3*, *ndhL*, *atpB* and *psaC*; Table 2) were influenced by the diel cycle alone and six other genes (*bicA2*, *ndhF4*, *ndhD4*, *chpX*, *rca* and *sod*) were influenced by neither time nor the applied environmental factors. Transcripts abundances of GOIs that were not affected by any of the three main factors, or were influenced by time only, are presented in the

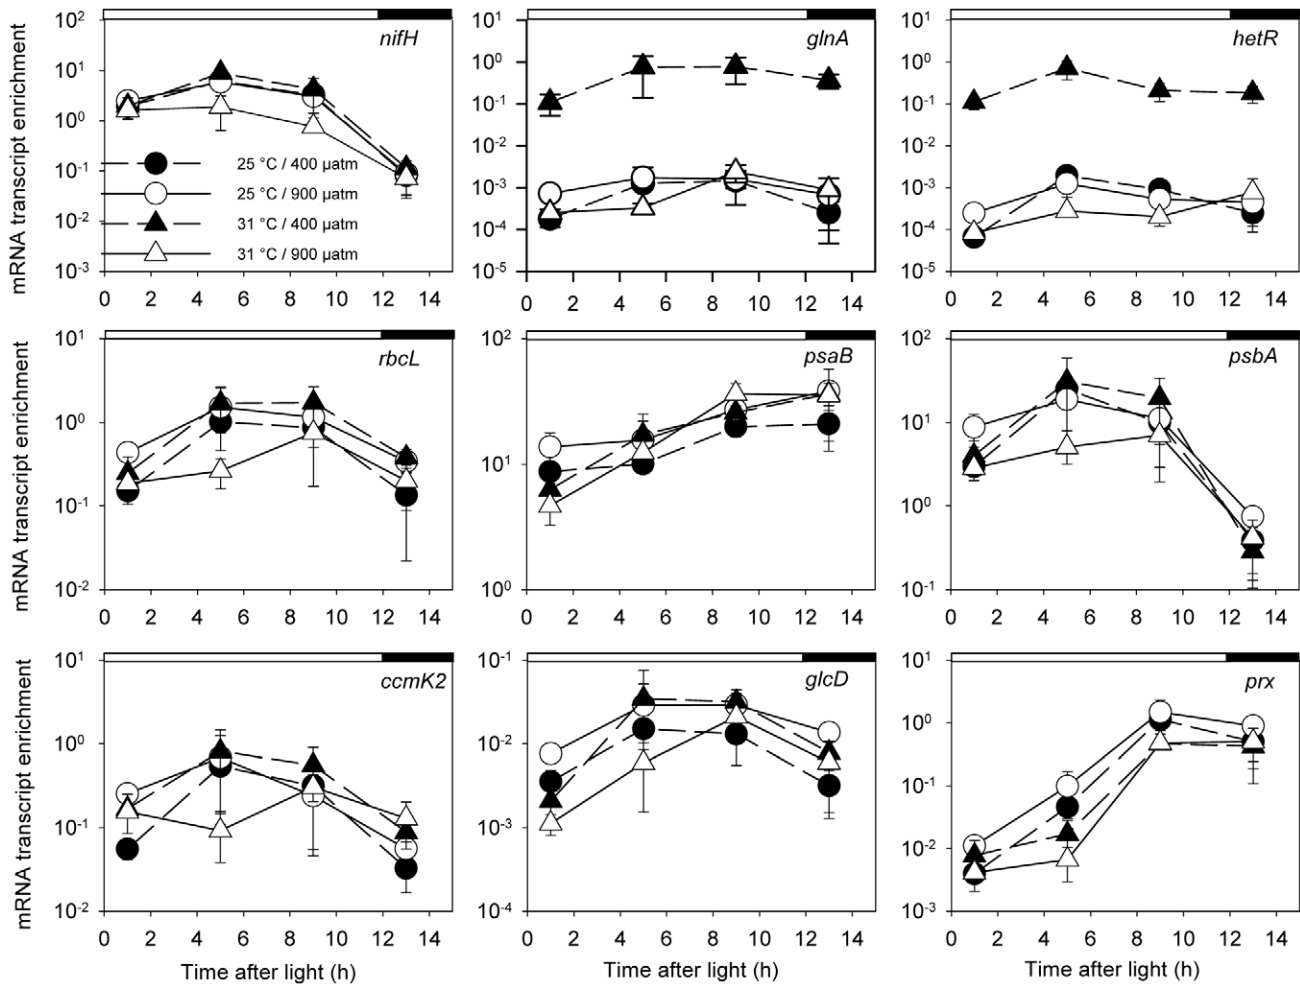

**Figure 2. Daily mRNA transcript enrichment of the nine GOIs, significantly influenced by the changing environmental factors.** Significant influence of pCO<sub>2</sub> (400 and 900 μatm) temperature (25 and 31°C) and their interaction on the GOI expression was determined according to a 3-Way ANOVA ( $p < 0.05$ , Table 2). All genes were also influenced by time. The upper panel presents genes related to nitrogen metabolism (*nifH*, *glnA* and *hetR*), the middle panel represents genes related with Ci fixation (*rbcL*) and photosynthesis (*psaB*, *psbA*) and the lower panel represents genes related to CCM (*ccmK2*) and energy generation (*glcD* and *prx*). Circles and triangles represent *Trichodesmium* acclimated to 25°C and 31°C, respectively. Black and open symbols represent *Trichodesmium* acclimated to 400 and 900 μatm pCO<sub>2</sub>, respectively. Relative abundance estimated according to the 2<sup>-ΔΔCt</sup> method, with 16S rRNA as the endogenous reference gene, and average ΔCt values of the *nifH* from the 400 μatm/25°C acclimation (control) as a calibrator. White and black bars on top of the graphs represent light and dark hours, respectively.  $n = 3$  for each gene at each time point per treatment. Errors are  $\pm 1$  standard deviation, following Bustin et al. (2009). Note: 1. the different y-axes scales; 2. the results and standard deviations are presented using logarithmic scale y axes. doi:10.1371/journal.pone.0015104.g002

supplemental data (Figure S1). Only nine GOIs were significantly affected by pCO<sub>2</sub> and/or temperature (*nifH*, *glnA*, *hetR*, *rbcL*, *psbA*, *psbA*, *prx*, *glcD*, and *ccmK2*). Seven of the nine GOIs that appeared sensitive to pCO<sub>2</sub> and/or temperature (*nifH*, *glnA*, *hetR*, *rbcL*, *psbA*, *psbA*, and *prx*; Figure 2) correspond with the nine genes expressed at the highest abundance (Figure 1). These genes are representative of the photosynthetic and Ci fixation, nitrogen metabolism and energy generation pathways.

While photosynthesis in *Trichodesmium* is relatively insensitive to changes in pCO<sub>2</sub> [4,6], N<sub>2</sub> fixation rates vary significantly with changes in ambient pCO<sub>2</sub> [3–5,8]. N<sub>2</sub> fixation, and possibly the sequential assimilation of ammonium, were affected by pCO<sub>2</sub> at the mRNA and activity level, while protein pools remained relatively constant (Table 3; [5]). Abundance of the nitrogenase Fe-protein gene, *nifH*, was affected by pCO<sub>2</sub>, time of day, and the combined influence of pCO<sub>2</sub> and temperature (Figure 2; [5]). This corroborates findings showing that *nifH* expression is pCO<sub>2</sub>

sensitive [5] and controlled by a circadian rhythm [31]. Relative stability of *nifH* expression to temperature changes was also reported for *Trichodesmium* IMS101 grown at 24, 28.5 and 31°C [31]. Similarly, temperature did not appreciably affect the abundance of the NifH protein and the nitrogenase N<sub>2</sub> fixation rates in the temperature range applied here (Table 3; [5]). *Trichodesmium* cultures tested under a broader temperature range revealed changes in growth and N<sub>2</sub> fixation rates [32]. As natural populations of *Trichodesmium* spp. range from 20 to 34°C (reviewed in [33]), it would be advisable to further examine the acclimation responses and levels of regulation under a wider temperature range.

*glnA* and *hetR* transcripts were statistically influenced by all three variables: pCO<sub>2</sub>, temperature and time of day (Table 2), in line with the reported influence of pCO<sub>2</sub> and time on both genes [5,30,34]. To our knowledge, scant data on the effect of environmental conditions on *glnA* and *hetR* expression in

**Table 2.** The influence of changing environmental conditions on the enrichment of all our GOIs.

| Significant interactions between factors<br>(additional to main factors) |                            |                       |                                   | Significant main factors                |                      |                        | Time is the only<br>influencing main factor | No influencing<br>factor |
|--------------------------------------------------------------------------|----------------------------|-----------------------|-----------------------------------|-----------------------------------------|----------------------|------------------------|---------------------------------------------|--------------------------|
| Time + pCO <sub>2</sub> +<br>temperature                                 | pCO <sub>2</sub> +<br>time | temperature +<br>time | pCO <sub>2</sub> +<br>temperature | Time, pCO <sub>2</sub> ,<br>temperature | Time,<br>temperature | Time, pCO <sub>2</sub> |                                             |                          |
| nifH                                                                     | glnA                       | prx                   | nifH                              | hetR                                    | prx                  | nifH                   | bicA1                                       | bicA2                    |
| glnA                                                                     |                            | glnA                  | ccmK2                             | glnA                                    |                      | psaB                   | ccmM                                        | ndhF4                    |
|                                                                          |                            |                       | rbcL                              |                                         |                      |                        | ccmK3                                       | ndhD4                    |
|                                                                          |                            |                       | glcD                              |                                         |                      |                        | ndhL                                        | chpX                     |
|                                                                          |                            |                       | glnA                              |                                         |                      |                        | atpB                                        | rca                      |
|                                                                          |                            |                       | hetR                              |                                         |                      |                        | psaC                                        | sod                      |
|                                                                          |                            |                       | psbA                              |                                         |                      |                        | psbA                                        |                          |

The environmental conditions are pCO<sub>2</sub>, temperature, and time. Gene expression was determined using 2<sup>-ΔΔCt</sup> method. Statistical analysis was made using 3-Way ANOVA (p<0.05). n = 24–25 for both temperatures, n = 23–25 for both pCO<sub>2</sub>, and n = 11–13 for each measuring time point. doi:10.1371/journal.pone.0015104.t002

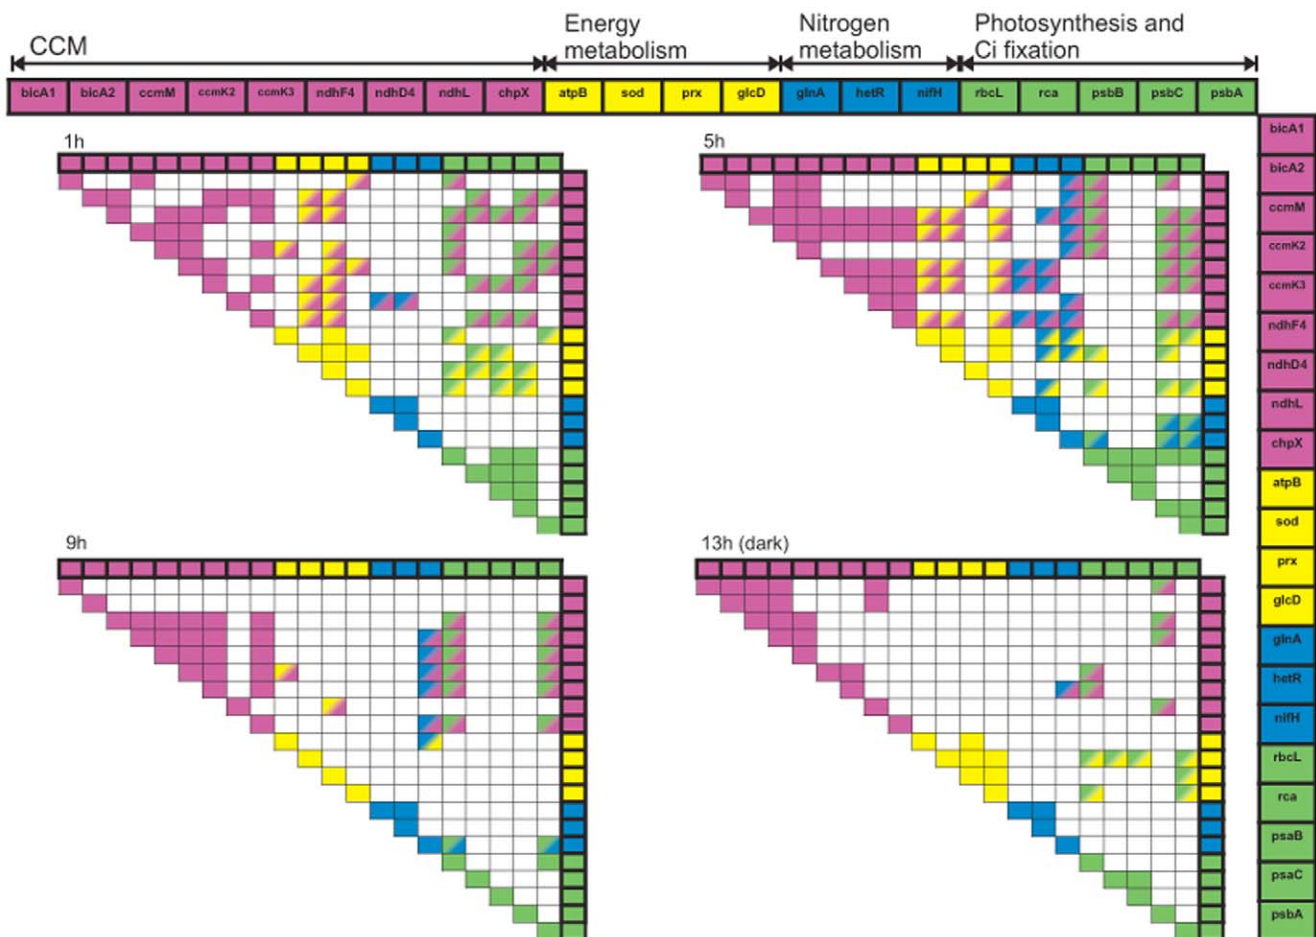

**Figure 3. Correlations between the abundance of the 21 GOIs during the daily cycle.** Sampling times were 1, 5, 9, 13 hours after the onset of light, presented from top-left to bottom-right. Colored cells represent a Pearson correlation coefficient  $r > 0.75$ . Correlations are presented regardless to the different acclimations. Genes are divided to 4 groups: CCM (pink), energy metabolism (yellow), nitrogen metabolism (blue), and photosynthesis and Ci fixation (green). When correlations were between genes from the same group, the cells were colored in the groups' color. When correlations were between genes from two different groups, the cells were colored using a gradient from one groups' color to the other. All the correlation coefficients and significances according to the Pearson correlation are supplied in the supplemental data (Table S1 i-iv). Relative abundance estimated according to the 2<sup>-ΔΔCt</sup> method, with 16S rRNA as the endogenous reference gene, and average ΔCt values of the *nifH* from the 400 μatm/25°C acclimation (control) as a calibrator. n = 11–13 for each gene at a given sampling time. doi:10.1371/journal.pone.0015104.g003

**Table 3.** Physiological characteristics of *Trichodesmium* IMS101 cultures acclimated to a matrix of pCO<sub>2</sub> and temperature.

|                                                                                                            | 400 $\mu\text{atm pCO}_2/25^\circ\text{C}$ | 400 $\mu\text{atm pCO}_2/31^\circ\text{C}$ | 900 $\mu\text{atm pCO}_2/25^\circ\text{C}$ | 900 $\mu\text{atm pCO}_2/31^\circ\text{C}$ |
|------------------------------------------------------------------------------------------------------------|--------------------------------------------|--------------------------------------------|--------------------------------------------|--------------------------------------------|
| Growth rate (chl d <sup>-1</sup> ) <sup>a</sup>                                                            | 0.17±0.04                                  | 0.27±0.01                                  | 0.33±0.03                                  | 0.38±0.08                                  |
| C:N (mol:mol) <sup>b</sup>                                                                                 | 7.3±0.9                                    | 6.6±0.7                                    | 6.5±0.4                                    | 5.97±0.51                                  |
| C:P (mol:mol) <sup>b</sup>                                                                                 | 139±28                                     | 164±48                                     | 118±32                                     | 196±27                                     |
| N:P (mol:mol) <sup>b</sup>                                                                                 | 19.5±5.4                                   | 25.2±9.0                                   | 18.3±5.5                                   | 33.1±4.9                                   |
| Maximal N <sub>2</sub> fixation rate (nmol N <sub>2</sub> chl <sup>-1</sup> h <sup>-1</sup> ) <sup>a</sup> | 4.8(1.4)                                   | 7.2(3.1)                                   | 20(5.3)                                    | 15.6(3.2)                                  |
| NifH (pmol (g protein <sup>-1</sup> ) at the time of maximum N <sub>2</sub> fixation)                      | 0.26±0.05                                  | 0.3±0.06                                   | 0.27±0.03                                  | 0.28±0.09                                  |
| GlnA (pmol $\mu\text{g protein}^{-1}$ ) at the time of maximum N <sub>2</sub> fixation <sup>a</sup>        | 0.05±0.01                                  | 0.05±0.02                                  | 0.07±0.02                                  | 0.07±0.02                                  |

<sup>a</sup>- n = 3–4

<sup>b</sup>- n = 12–13

Acclimation pCO<sub>2</sub> levels were 400 and 900  $\mu\text{atm}$  and temperatures were 25 and 31°C. The extended data set and discussion of the physiological responses were previously reported (Levitan et al., 2010a) and are summarized here to emphasize physiological changes associated with the gene abundance presented from the same cultures.

doi:10.1371/journal.pone.0015104.t003

*Trichodesmium* shows that fixed-nitrogen sources and diurnal rhythmicity regulated *glnA* expression in natural populations of marine *Synechococcus* spp [35] and *hetR* expression in *Trichodesmium* [30]. The *hetR* gene, previously suggested to be involved only in heterocysts differentiation, was also found in the non-heterocystous filamentous diazotroph *Symploca* PCC8002 [36] and *Lyngbya* PCC8106 [37]. The existence of *hetR* in *Trichodesmium*, *Symploca* PCC8002a and *Lyngbya* PCC8106, its regulation by combined nitrogen status and time [36,37], and the apparent sensitivity of *Trichodesmium's hetR* to pCO<sub>2</sub> (also affecting N<sub>2</sub> fixation; Figure 2, Table 2), further suggest that *hetR* must play a critical role in diazotroph nitrogen metabolism and is not limited to heterocyst differentiation [37].

The regulation of photosynthetic genes is essential in *Trichodesmium* where photosynthetic O<sub>2</sub> evolution is separated from N<sub>2</sub> fixation by a complex spatial-temporal strategy. To enable N<sub>2</sub> fixation, down regulation of photosystem II (PSII), possibly controlled by redox state of the plastoquinone (PQ) pool, occurs at midday [13]. Changing expression levels and patterns of photosynthetic genes can influence *Trichodesmium's* metabolism. In *Trichodesmium*, the expression pattern of *psaB* and *psbA* were affected by pCO<sub>2</sub> [5]. Our data reveal that while photosystem I (PSI) core protein gene *psaC* was influenced only by time, *psaB* (PSI) was influenced by both pCO<sub>2</sub> and time and *psbA* (PSII) was influenced by time and the interaction between pCO<sub>2</sub> and temperature, with no apparent sensitivity to temperature as the predominant factor (Table 2, Figure 2). *psaA* and *psbA* are controlled by a circadian rhythm and their expression pattern did not change between 24 and 28.5°C [12]. *psaA* and *psaB* are closely located in *Trichodesmium's* genome and their interaction is highly conserved for many cyanobacteria [38]. Therefore, we deduce that the temperature insensitivity of *psaA* [12] corroborates our finding (Table 2, Figure 2).

Three additional genes, *cmk2*, *rbcL* and *gldD*, were influenced by the 2-Way interaction of pCO<sub>2</sub> and temperature (Table 2). Presently, there is no report on the expression and regulation of these genes in *Trichodesmium*. In *Synechococcus* PCC7942, but not in all cyanobacteria, the *cm* operon is located in the 5'-flanking region on the *rbcL-rbcS* operon [39,40]. However, our genomic analysis reveals that *rbcL* and *cmk2* are not closely oriented in the *Trichodesmium* genome. In *Synechocystis* PCC6803, *rbcL* expression was insensitive to changes in pCO<sub>2</sub> (0 to 3% CO<sub>2</sub> in air; [41]). Our findings show that *rbcL* expression was modified only when

combining high pCO<sub>2</sub> with high temperature, yet its abundance was still at the same order of magnitude for all acclimations. In *Synechocystis* PCC6803 the Ci derived transcriptional changes in *rbcL* transcript amount were uncoupled from changes in RbcL protein level, possibly resulting from low protein turnover rate due to the protective effect of the carboxysome, slowing down the protein degradation [42]. This was also indicated for *Trichodesmium* in our study. While pCO<sub>2</sub> alone and the combination of pCO<sub>2</sub> and temperature influenced the RbcL protein amount, the highest protein level was at 900  $\mu\text{atm}/25^\circ\text{C}$  while the highest transcript level appeared at 900  $\mu\text{atm}/31^\circ\text{C}$  (unpublished data; Figure 2).

The oxygenase activity of RubisCO forms 2-phosphoglycolate (2PG), considered toxic for Ci fixation in the Calvin cycle. The GlcD protein helps protect the Calvin cycle by converting two molecules of 2PG into one 3-phosphoglycerate (3PGA) molecule (the product of RubisCO's carboxylase activity), and thus enables Ci fixation to proceed. *gldD* metabolism was found essential for the viability of the cells and oxygenic photosynthesis in the cyanobacterium *Synechocystis* PCC6803 at ambient CO<sub>2</sub> conditions [43]. Statistical analysis (3-Way ANOVA, p<0.05) revealed that the *gldD* mRNA abundance was sensitive to the combined influence of pCO<sub>2</sub> and temperature, yet its abundance was the same for all our acclimations (Figure 2, Table 2). Although *gldD* is also found in *Arabidopsis* and *Anabaena* [43], there is generally scarce information regarding the expression and regulation of this gene.

Temperature, time of day and their interaction affected the 1-cys peroxiredoxin gene, *prx* (Table 2), increasing its abundance by 3 orders of magnitude from 1 to 9 h after the onset of light (Figure 2). 1-cys *prx* mRNA increased in response to different metabolic imbalances in *Synechocystis* PCC6803, including irradiation, salinity, and iron deficiency [44]. No data are currently available on changes of *prx* at different pCO<sub>2</sub> and/or temperatures in *Trichodesmium* and other cyanobacteria. O<sub>2</sub> generated in PSII is reduced to H<sub>2</sub>O<sub>2</sub> by PSI related components [45]. In cyanobacteria peroxiredoxin reduces H<sub>2</sub>O<sub>2</sub> to H<sub>2</sub>O using electrons donated from a variety of substrates [46]. Increased expression of iron and oxidative stress genes at the end of the high N<sub>2</sub> fixation period was detected for cultures of the unicellular diazotroph *Crocospaera watsonii* [47]. Biological fixation of one N<sub>2</sub> molecule requires at least 16 ATP molecules that can be generated via cyclic electron flow around PSI [48]. Thus, in *Trichodesmium*, the higher expression of *prx* in the second half of the photoperiod may be required to recover from the high energetic demand for N<sub>2</sub>

fixation, leaving the cell susceptible to oxidative stress. In addition, peroxidases function as regulators of redox-mediated signal transduction in some eukaryotes [49,50], and are therefore important components for the cellular antioxidant defense system and redox homeostasis [46]. Redox state of shared components between photosynthesis and respiration regulates gene expression in *Trichodesmium* [13,51]. Hence, changes in *prx* expression reported here (Figure 2, Table 2) indicate that oxidative defense, photosynthesis and/or respiratory redox state in *Trichodesmium* are temperature and time dependent.

Our results indicate that these nine genes (*nifH*, *glnA*, *hetR*, *rbcL*, *psbA*, *psaB*, *prx*, *glcD* and *ccmK2*) are non-constitutively expressed and are regulated both by a diurnal cycle and by environmental factors such as pCO<sub>2</sub> and temperatures.

**Expression of CCM genes**

The nine CCM-related GOIs that were tested are representative of all known CCM complexes in *Trichodesmium*: the carboxysome (*ccmM*, *ccmK2*, *ccmK3*) that contains the cellular Ci fixation enzyme RubisCO (*rbcL*; [19]), HCO<sub>3</sub><sup>-</sup> transporter named BicA (*bicA1*, *bicA2*), and the specialized NADPH dehydrogenase NDH-I<sub>4</sub> (*ndhF4*, *ndhD4*, *ndhL*, and *chpX*). *Trichodesmium* lacks any genes of inducible-high affinity uptake system for both CO<sub>2</sub> and HCO<sub>3</sub><sup>-</sup>, such as NDH-I<sub>3</sub> (CO<sub>2</sub>), BCT1 or SbtA (HCO<sub>3</sub><sup>-</sup>; [18,19]), and has no recognizable carbonic anhydrase (CA) genes [18].

CCM operation in algae is regulated by environmental factors with elevated CO<sub>2</sub> levels expected to reduce the cellular requirements for concentrating Ci, and enabling enhanced growth [52]. All of our nine examined CCM-related GOIs (Table 1) exhibited similar expression patterns and low expression levels when compared to Ci fixation, photosynthesis and nitrogen metabolism genes (Figure 1). Only one gene, the *ccmK2*, was affected by changes in environmental conditions (Figure 2, Table 2). For all time points measured, the expression of the CCM related genes had the highest correlations of all the GOIs metabolic groups. This applies within the CCM group and also with the other functional groups (Figure 3).

CCM genes of high Ci affinity are known to be regulated at the transcript level [53]. Our experimental setup is different in two aspects from “classical” cyanobacterial CCM induction experiments: 1. we report on a steady state expression of CCM genes under long term constant CO<sub>2</sub> conditions, whereas in most publications cells are rapidly transferred (usually less than 1 day) from one CO<sub>2</sub> concentration to another; 2. Trying to work on ecologically relevant pCO<sub>2</sub> concentrations, we applied 400 and 900 μatm pCO<sub>2</sub>. This change is very small in comparison to concentrations >1% CO<sub>2</sub> that are usually referred to as high CO<sub>2</sub> in CCM-literature. As publications reporting steady state CCM gene expression and acclimations to ecologically relevant pCO<sub>2</sub> levels are scarce we will use the available literature to discuss our data.

In *Synechocystis* PCC6803, genes of low affinity CCM components such as *ndhD4*, *ndhF4*, *chpX*, and *ccmK-N* [41,42] and *bicA* [42,53] were Ci insensitive, constitutively expressed, and revealed relatively low transcript abundance as we found for *Trichodesmium* (Figures 1 and 3, Table 2). In *Synechococcus* PCC7002 *bicA* is regulated by a *ccmR* gene [53], which is absent in the *Trichodesmium* genome [19].

In *Trichodesmium*'s genome, most of the CCM-related genes are not arranged in operons or clusters ([http://genome.jgi-psf.org/finished\\_microbes/trier/trier.home.html](http://genome.jgi-psf.org/finished_microbes/trier/trier.home.html)), as was previously shown for *Synechocystis* PCC6803 [54]. This also applies for the three CCM-related gene-pairs that were co-expressed over the day, *ccmM-ccmK3*, *ccmK3-ccmK2* (carboxysome shell) and *ndhF4-*

*ndhD4* (NDH-I<sub>4</sub>; Table 4). We conclude that in *Trichodesmium*, CCM genes are constitutively expressed and are mostly unaffected by the applied changes in pCO<sub>2</sub> and temperature.

Genomic analyses indicate that *Trichodesmium* lacks inducible inorganic carbon (Ci) uptake systems [18,19]. Yet, physiological measurements of Ci uptake showed that *Trichodesmium* changes its Ci uptake characteristics when acclimated to high CO<sub>2</sub> (900 μatm; [6,7]). While the cell's affinity to total DIC decreased with elevated pCO<sub>2</sub> [6], the cell's CO<sub>2</sub> uptake increased [7]. Under a range of pCO<sub>2</sub> (150-900 μatm pCO<sub>2</sub>), *Trichodesmium* uses HCO<sub>3</sub><sup>-</sup> for over 90% of its Ci source ([6]; Kranz and Levitan, unpublished data). Based on the genetic analysis (Figure 1; [19]), the Km of Ci uptake [6] and BicA being a low-affinity but high flux HCO<sub>3</sub><sup>-</sup> uptake system [20], it is likely that a major part of *Trichodesmium*'s Ci uptake is via the Na<sup>+</sup> dependent HCO<sub>3</sub><sup>-</sup> transporter BicA.

The operation of a Ci uptake system that maintains constant transcription levels while its affinity is modified indicates that CCM operation in *Trichodesmium* is controlled at the translational or post-translational levels. Changes in CCM operation without altering gene expression or the cell's capacity to transport Ci was proposed by Beardall and Giordano [52], i.e. via fluctuations in the redox state of the PQ pool. A rapid increase in HCO<sub>3</sub><sup>-</sup> transport activity appears to involve phosphorylation events, possibly by activating two or three component regulatory systems, is of considerable importance when looking at CCM regulation [55,56]. The thioredoxin regulatory system and internal Ci pools can also act in controlling CCM operation, away from the transcript level [55,57]. Moreover, it is possible that large transcript changes were not detected in *Trichodesmium*'s CCM genes due to the long acclimations (>2 months) of the cultures, whereas a rapid transfer of *Trichodesmium* from low to high CO<sub>2</sub> may result in changes in transcript abundance. Finally, although there are physiological changes in cells grown at different pCO<sub>2</sub>s [2–8], it could be that the acclimation to 900 μatm pCO<sub>2</sub> does not simulate a large enough increase to detect significant differences in CCM gene abundance.

Our analyses show low transcript abundance of co-expressed CCM genes in *Trichodesmium* (Figures 1 and 3) that are insensitive to changes in pCO<sub>2</sub> and temperature (Figure 2; Table 2). This, together with genomic analysis [19] and physiological data, suggest that CCM genes in *Trichodesmium* are constitutively expressed under our applied conditions.

**Co-expression of GOIs**

We explored co-expression of GOIs by examining the correlations between their enrichment at all measured time points. Figure 3 presents GOIs with Pearson correlation coefficients

**Table 4.** Correlations between four GOI pairs that were co-expressed at all measured time points.

| Hours after the onset of light |               |               |               | Gene pair          |
|--------------------------------|---------------|---------------|---------------|--------------------|
| 13 h (dark)                    | 9 h           | 5 h           | 1 h           |                    |
| 0.767 (0.004)                  | 0.781 (0.003) | 0.802 (0.000) | 0.828 (0.002) | <i>ccmM-ccmK3</i>  |
| 0.792 (0.002)                  | 0.816 (0.001) | 0.911 (0.000) | 0.778 (0.005) | <i>ccmK3-ccmK2</i> |
| 0.913 (0.000)                  | 0.923 (0.000) | 0.963 (0.000) | 0.832 (0.001) | <i>ndhF4-ndhD4</i> |
| 0.912 (0.000)                  | 0.990 (0.000) | 0.969 (0.000) | 0.978 (0.000) | <i>hetR-glnA</i>   |

Presented values are the Pearson correlation coefficient and the significance is in the parentheses. Sampling points were 1, 5, 9, 13 hours after the onset of light.

doi:10.1371/journal.pone.0015104.t004



higher than 0.75 ( $r > 0.75$ ,  $p < 0.01$ , all correlations are given in Table S1 i-iv in the supplemental data). The highest number of significant correlations between GOIs of different metabolic functions appeared 5 h after the onset of light, when high  $N_2$  fixation rates and assimilation are detected [5,13,58]. A large number of correlations were also observed between genes 1 h after the onset of light. Later in the day, at 9 and 13 h, a significantly lower number of correlations were detected, especially between GOIs related to different metabolic groups, indicating only limited co-expression.

Expression levels of nitrogen metabolism GOIs (*glnA*, *hetR*, *nifH*) were correlated with GOIs of other metabolic functions predominantly at 5 and 9 hours after the onset of light, yet the highest number of correlations was found at 5 h (Figure 3). The limited literature on gene expression patterns in *Trichodesmium* demonstrated diurnal regulation of genes correlated with photosynthesis and nitrogen metabolism [12,30,31,35,59]. At 9 h, only *nifH* was co-expressed with GOIs of other metabolic functional groups, especially with the carboxysomal, NDH-I<sub>4</sub> and photosynthesis related genes. Chen et al. [12] demonstrated a time-dependent cycling and coupling between *nifH* and photosynthetic transcripts in *Trichodesmium*. Our results showed that *nifH* was co-expressed with the photosynthesis-related genes (*psaC*, *psbA* and *rbcL*), with all CCM components, and with two of the energy metabolism genes (*atpB* and *sod*).

Out of the three nitrogen metabolism genes tested, only the *glnA*-*hetR* gene pair was co-expressed for all time points measured (Figure 3, Table 4), although they are not closely localized in the *Trichodesmium* genome ([http://genome.jgi-psf.org/finished\\_microbes/trier/trier.home.html](http://genome.jgi-psf.org/finished_microbes/trier/trier.home.html)). *hetR* was also highly correlated to the NDH-I<sub>4</sub> genes, to *atpB*, and to *sod*. The co-expression of *glnA* and *hetR* did not correspond with *nifH* expression (Figure 3), in agreement with other studies showing that *hetR* expression was inversely correlated with *nifH* expression in *Trichodesmium* [30,34]. In *Trichodesmium*, both *glnA* and *hetR* are likely under *ntcA* regulation [34], yet we couldn't verify this in our experiment.

Energy metabolism related GOIs (*atpB*, *sod*, *prx*, and *glcD*) were co-expressed and positively correlated with all CCM related GOIs and photosynthetic genes at 1 and 5 h after the onset of light. This could be related to the energetically demands of the CCM, and to the connection between photosynthetic electron transfer and the use of these electrons in sequential processes (Figure 3; [6,7]). *prx* correlated with many other GOIs only 1 h after the onset of light. This correlation disappeared from 5 h onwards, when *prx* mRNA abundance rapidly increased (Figures 1 and 2).

Positive correlations between Ci fixation and photosynthesis to CCM GOIs were observed at all measured time points. A high number of correlations were especially noted 1 and 5 h after the onset of light for *rbcL* and *psbA* together with the CCM GOIs (i.e. *rbcL-ccmK2* at 1, 5 and 9 h). Fewer correlations, predominantly occurring at 5 h, were detected between photosynthetic and nitrogen metabolism GOIs (Figure 3). Co-expression of CCM and photosynthetic genes at the first half of the photoperiod (when photosynthesis and carbon fixation take place) could account for the tight interaction observed between the two mechanisms [6,20].

The co-expression of GOIs we observed fundamentally reflects the diurnal patterns of the predominant metabolic pathways in *Trichodesmium* (CCM, photosynthesis and carbon fixation, nitrogen metabolism, and energy generation). Transcriptional regulation is the first level of regulation, followed by translational and post-translational regulation. Different levels of metabolic regulations were found in *Trichodesmium*, for example for nitrogenase [5,16,17,31] and PSII [8,12]. The differing patterns of co-expression between the metabolic gene families during the day

(Figure 3) indicate a strategy of a complex and tightly regulated gene expression. In *Trichodesmium*, such a strategy is required due to the unique spatial-temporal segregation of oxygenic photosynthesis and  $N_2$  fixation [12–14].

## Conclusions

Our motivation in this study was to examine changes in expression of essential metabolic genes in *Trichodesmium* grown under a matrix of  $pCO_2$  and temperature. In *Trichodesmium* IMS101, nitrogen metabolism, Ci fixation, and photosynthesis related GOIs exhibited the highest abundance of all measured genes (Figure 1). These genes were also mostly affected by changes in  $pCO_2$ , temperature and the time within the diurnal period (Figure 2, Table 2), suggesting that these metabolic functions are also controlled at the mRNA transcript level. To our knowledge this is the first report of CCM gene expression in *Trichodesmium*. We suggest that CCM genes in *Trichodesmium* are constitutively expressed under our applied conditions, yet, their corresponding protein activity may be altered by changes in  $pCO_2$  [6,7], probably due to translational and/or post-translational regulations [19].

Protein and activity levels of the CCM and fixation pathways in *Trichodesmium* are influenced by environmental changes [5–8]. Thus, we hypothesized that modifications in the CCM genes expression due to elevated  $pCO_2$  may facilitate the reported physiological changes. Our results negate this hypothesis as the expression of CCM-genes under long term acclimation (steady state conditions) was insensitive to changes in experimental conditions. The comprehensive analysis of abundance and expression patterns of the GOIs presented here, demonstrates that gene expression may be uncoupled from translational and protein activity levels. Thus, although gene expression reflects active metabolic pathways, there is often an uncoupling between transcription and enzyme activity. Therefore we conclude that to examine the effects of environmental parameters on *Trichodesmium* and its biogeochemical impact, studies of gene transcript levels should be done in parallel with physiological and activity measurements.

## Supporting Information

**Figure S1 Daily mRNA transcript enrichment of 12 GOIs, not significantly influenced by changing environmental factors.** Significant influence of  $pCO_2$  (400 and 900  $\mu atm$ ) temperature (25 and 31 °C) and their interaction, on the GOI expression was done according to a 3-Way ANOVA ( $p < 0.05$ , Table 3). The left panel represent GOIs that no influencing factor (*bicA2*, *ndhD4*, *ndhF4*, *chpX*, *rca*, *sod*) and the right panel represent genes for which time was the only influencing factor. Circles and triangles represent *Trichodesmium* acclimated to 25 °C and 31 °C, respectively. Black and open symbols represent *Trichodesmium* acclimated to 400 and 900  $\mu atm$   $pCO_2$ , respectively. Relative abundance estimated according to the  $2^{\Delta\Delta Ct}$  method, with 16S rRNA as the endogenous reference gene, and average  $\Delta Ct$  values of the *nifH* from the 400  $\mu atm$  / 25 °C acclimation (control) as a calibrator. White and black bars on top of the graphs represent light and dark hours, respectively.  $n = 3$  for all. Errors are  $\pm 1$  standard deviation, following Bustin et al. (2009). Note: 1. the different y-axes scales; 2. the results and standard deviations are presented using logarithmic scale y axes. (TIF)

**Table S1 Pearson correlations of the enrichment of the 21 genes of interest over the day.** i- 1 h after the onset of

light; ii- 5h after the onset of light; iii- 9 h after the onset of light; iv- 13 h after the onset of light. Relative abundance estimated according to the  $2^{-\Delta\Delta Ct}$  method, with 16S rRNA as the endogenous reference gene, and average  $\Delta Ct$  values of the *nifH* from the 400  $\mu\text{atm}$  / 25°C treatments as a calibrator.  $n = 11-13$  for each gene at a given sampling time. Upper value represents the correlation coefficient ( $r$ ) and lower values represent the significance ( $p$ ). (DOCX)

## References

- Carpenter EJ, Capone DG (2008) Nitrogen fixation in the marine environment. In: Capone DG, Brok DA, Mulholland MR, Carpenter EJ, editors. Nitrogen in the Marine Environment. San Diego: Academic Press. pp 141–198.
- Ramos BJ, Biswas H, Schulz K, LaRoche J, Riebesell U (2007) Effect of rising atmospheric carbon dioxide on the marine nitrogen fixer *Trichodesmium*. Global biogeochemical cycles 21.
- Hutchins DA, Fu FX, Zhang Y, Warner ME, Feng Y, et al. (2007) CO<sub>2</sub> control of *Trichodesmium* N<sub>2</sub> fixation, photosynthesis, growth rates, and elemental ratios: Implications for past, present, and future ocean biogeochemistry. Limnology and Oceanography 52: 1293–1304.
- Levitan O, Rosenberg G, Setlik I, Setlikova E, Grigel J, et al. (2007) Elevated CO<sub>2</sub> enhances nitrogen fixation and growth in the marine cyanobacterium *Trichodesmium*. Global Change Biology 13: 531–538.
- Levitan O, Brown C, Sudhaus S, Campbell D, LaRoche J, et al. (2010) Regulation of nitrogen metabolism in the marine diazotroph *Trichodesmium* IMS101 under varying temperatures and atmospheric CO<sub>2</sub> concentrations. Environmental Microbiology. 12(7): 1899–1912.
- Kranz S, Sültemeyer D, Richter K-U, Rost B (2009) Carbon acquisition by *Trichodesmium*: the effect of pCO<sub>2</sub> and diurnal changes. Limnology and Oceanography 54: 548–559.
- Kranz SA, Levitan O, Richter KU, Prasil O, Berman-Frank I, et al. (2010) Combined effects of pCO<sub>2</sub> and light on the N<sub>2</sub> fixing cyanobacteria *Trichodesmium* IMS101: Physiological responses. Plant Physiology 154: 334–345.
- Levitan O, Kranz SA, Spungin D, Prasil O, Rost B, et al. (2010) The combined effects of pCO<sub>2</sub> and light on the N<sub>2</sub> fixing cyanobacterium *Trichodesmium* IMS101: A mechanistic view. Plant Physiology 154: 346–356.
- Kana TM (1993) Rapid oxygen cycling in *Trichodesmium thiebautii*. Limnology and Oceanography 38: 18–24.
- Bergman B, Gallon JR, Rai AN, Stal LJ (1997) N<sub>2</sub> fixation by non-heterocystous cyanobacteria. FEMS Microbiology reviews 19: 139–185.
- Lin SJ, Henze S, Lundgren P, Bergman B, Carpenter EJ (1998) Whole-cell immunolocalization of nitrogenase in marine diazotrophic cyanobacteria, *Trichodesmium* spp. Applied and Environmental Microbiology 64: 3052–3058.
- Chen YB, Dominic B, Zani S, Mellon MT, Zehr JP (1999) Expression of photosynthesis genes in relation to nitrogen fixation in the diazotrophic filamentous nonheterocystous cyanobacterium *Trichodesmium* sp IMS 101. Plant Molecular Biology 41: 89–104.
- Berman-Frank I, Lundgren P, Chen Y-B, Kupper H, Kolber Z, et al. (2001) Segregation of nitrogen fixation and oxygenic photosynthesis in the marine cyanobacterium *Trichodesmium*. Science 294: 1534–1537.
- Kupper H, Ferimazova N, Setlik I, Berman-Frank I (2004) Traffic lights in *Trichodesmium*. Regulation of photosynthesis for nitrogen fixation studied by chlorophyll fluorescence kinetic microscopy. Plant Physiology 135: 2120–2133.
- Milligan AJ, Berman-Frank I, Gerchman Y, Dismukes GC, Falkowski PG (2007) Light-dependent oxygen consumption in nitrogen-fixing cyanobacteria plays a key role in nitrogenase protection. Journal of Phycology 43: 845–852.
- Ohki K, Zehr JP, Fujita Y (1992) Regulation of nitrogenase activity in relation to the light dark regime in the filamentous nonheterocystous cyanobacterium *Trichodesmium* sp NIBB1067. Journal of General Microbiology 138: 2679–2685.
- Zehr J, Wyman M, Miller V, Duguay L, Capone DG (1993) Modification of the Fe protein of nitrogenase in Natural populations of *Trichodesmium thiebautii*. Applied Environmental Microbiology 59: 669–676.
- Badger MR, Price GD (2003) CO<sub>2</sub> concentrating mechanisms in cyanobacteria: molecular components, their diversity and evolution. Journal of Experimental Botany 54: 609–622.
- Price GD, Badger MR, Woodger EJ, Long BM (2008) Advances in understanding the cyanobacterial CO<sub>2</sub>-concentrating-mechanism (CCM): functional components, Ci transporters, diversity, genetic regulation and prospects for engineering into plants. Journal of Experimental Botany 59: 1441–1461.
- Price GD, Woodger EJ, Badger MR, Howitt SM, Tucker L (2004) Identification of a SulP-type bicarbonate transporter in marine cyanobacteria. Proceedings of

## Acknowledgments

This work was conducted as a partial fulfillment of the requirements for a PhD thesis for O. Levitan at Bar Ilan University. We wish to thank Ms. Diana Hümmel (IFM-GEOMAR). Bioinformatic work was done using the *Trichodesmium* genome published on the Joint Genome Institute (JGI) website. The work conducted by the U.S. Department of Energy Joint Genome.

## Author Contributions

Conceived and designed the experiments: OL SS JLR IBF. Performed the experiments: OL SS JLR IBF. Analyzed the data: OL SS JLR IBF. Contributed reagents/materials/analysis tools: OL SS JLR IBF. Wrote the paper: OL SS JLR IBF. Funding: JLR IBF.

- the National Academy of Sciences of the United States of America 101: 18228–18233.
- Palmqvist K, Yu JW, Badger MR (1994) Carbonic-anhydrase activity and inorganic carbon fluxes in low-Ci and high-Ci cells of *Chlamydomonas reinhardtii* and *Scenedesmus-obliquus*. Physiologia Plantarum 90: 537–547.
- Badger MR, Price GD, Long BM, Woodger EJ (2006) The environmental plasticity and ecological genomics of the cyanobacterial CO<sub>2</sub> concentrating mechanism. Journal of Experimental Botany 57: 249–265.
- Pena KL, Castel SE, de Araujo C, Espie GS, Kimber MS (2010) Structural basis of the oxidative activation of the carboxysomal gamma-carbonic anhydrase, CcmM. Proceedings of the National Academy of Sciences of the United States of America 107: 2455–2460.
- Chen YB, Zehr JP, Mellon M (1996) Growth and nitrogen fixation of the diazotrophic filamentous nonheterocystous cyanobacterium *Trichodesmium* sp IMS 101 in defined media: Evidence for a circadian rhythm. Journal of Phycology 32: 916–923.
- Ramakers C, Ruijter JM, Deprez RHL, Moorman AFM (2003) Assumption-free analysis of quantitative real-time PCR data. Neuroscience Letters 339: 62–66.
- Livak K, Schmittgen T (2001) Analysis of relative gene expression data using real-time quantitative PCR and the  $2^{-\Delta\Delta Ct}$  method. Methods 25: 402–408.
- Schmittgen TD, Livak KJ (2008) Analyzing real-time PCR data by the comparative C<sub>T</sub> method. Nature protocols 3: 1101–1108.
- Bustin SA, Benes V, Garson JA, Hellemans J, Huggett J, et al. (2009) The MIQE Guidelines: Minimum Information for Publication of Quantitative Real-Time PCR Experiments. Clinical Chemistry 55: 611–622.
- Hewson I, Poretsky RS, Dyhrman ST, Zielinski B, White AE, et al. (2009) Microbial community gene expression within colonies of the diazotroph, *Trichodesmium*, from the Southwest Pacific Ocean. Isme Journal 3: 1286–1300.
- El-Shehawry R, Lugomela C, Ernst A, Bergman B (2003) Diurnal expression of *hetR* and diazocyte development in the filamentous non-heterocystous cyanobacterium *Trichodesmium erythraeum*. Microbiology-Sgm 149: 1139–1146.
- Chen YB, Dominic B, Mellon MT, Zehr JP (1998) Circadian rhythm of nitrogenase gene expression in the diazotrophic filamentous nonheterocystous Cyanobacterium *Trichodesmium* sp strain IMS101. Journal of Bacteriology 180: 3598–3605.
- Breitbarth E, Oschlies A, LaRoche J (2007) Physiological constraints on the global distribution of *Trichodesmium* - effect of temperature on diazotrophy. Biogeosciences 4: 53–61.
- Langlois RJ, LaRoche J, Raab PA (2005) Diazotrophic diversity and distribution in the tropical and subtropical Atlantic ocean. Applied and Environmental Microbiology 71: 7910–7919.
- Sandh G, El-Shehawry R, Diez B, Bergman B (2009) Temporal separation of cell division and diazotrophy in the marine diazotrophic cyanobacterium *Trichodesmium erythraeum* IMS101. FEMS Microbiology Letters 295: 281–288.
- Wyman M (1999) Diel rhythms in ribulose-1,5-bisphosphate carboxylase/oxygenase and glutamine synthetase gene expression in a natural population of marine picoplanktonic cyanobacteria (*Synechococcus* spp.). Applied and Environmental Microbiology 65: 3651–3659.
- Janson S, Matveyev A, Bergman B (1998) The presence and expression of *hetR* in the non-heterocystous cyanobacterium *Symplaea* PCC 8002. Fems Microbiology Letters 168: 173–179.
- Zhang J-Y, Chen W-L, Zhang C-C (2009) *hetR* and *patS*, two genes necessary for heterocyst pattern formation, are widespread in filamentous nonheterocyst-forming cyanobacteria. Microbiology 155: 1418–1426.
- Shi T, Bibby TS, Jiang L, Irwin AJ, Falkowski PG (2005) Protein interactions limit the rate of evolution of photosynthetic genes in cyanobacteria. Molecular Biology and Evolution 22: 2179–2189.
- Kaplan A, Hagemman M, Bauwe H, Kahlon S, Ogawa T (2008) Carbon acquisition by cyanobacteria: Mechanisms, comparative genomics, and evolution In: Herrero A, Flores E, eds. The cyanobacteria: Molecular biology, genetics and evolution. Norfolk, UK: Caister academin press. pp 305–333.
- Kaplan A, Schwarz R, Lieman-Hurwitz J, Reinhold L (1994) Physiological and molecular studies on the response of cyanobacteria to changes in the ambient

- inorganic carbon concentration. In: Bryant D, ed. *The molecular biology of the cyanobacteria*. Dordrecht, the Netherlands: Kluwer Academic Publishers. pp 469–485.
41. McGinn PJ, Price GD, Maleszka R, Badger MR (2003) Inorganic carbon limitation and light control the expression of transcripts related to the CO<sub>2</sub>-concentrating mechanism in the cyanobacterium *Synechocystis* sp strain PCC6803. *Plant Physiology* 132: 218–229.
  42. Eisenhut M, von Wobeser EA, Jonas L, Schubert H, Ibelings BW, et al. (2007) Long-term response toward inorganic carbon limitation in wild type and glycolate turnover mutants of the cyanobacterium *Synechocystis* sp strain PCC 6803(1[W]). *Plant Physiology* 144: 1946–1959.
  43. Eisenhut M, Ruth W, Haimovich M, Bauwe H, Kaplan A, et al. (2008) The photorespiratory glycolate metabolism is essential for cyanobacteria and might have been conveyed endosymbiotically to plants. *Proceedings of the National Academy of Sciences of the United States of America* 105: 17199–17204.
  44. Stork T, Michel KP, Pistorius EK, Dietz KJ (2005) Bioinformatic analysis of the genomes of the cyanobacteria *Synechocystis* sp PCC 6803 and *Synechococcus elongatus* PCC 7942 for the presence of peroxiredoxins and their transcript regulation under stress. *Journal of Experimental Botany* 56: 3193–3206.
  45. Badger MR, von Caemmerer S, Ruuska S, Nakano H (2000) Electron flow to oxygen in higher plants and algae: Rates and control of direct photoreduction (Mehler reaction) and rubisco oxygenase. *Philosophical Transactions of the Royal Society of London B Biological Sciences* 355: 1433–1446.
  46. Bernroither M, Zamocky M, Furtmuller PG, Peschek GA, Obinger C (2009) Occurrence, phylogeny, structure, and function of catalases and peroxidases in cyanobacteria. *Journal of Experimental Botany* 60: 423–440.
  47. Shi T, Iikchyan I, Rabouille S, Zehr JP (2010) Genome-wide analysis of diel gene expression in the unicellular N<sub>2</sub>-fixing cyanobacterium *Crocosphaera watsonii* WH 8501. *ISME Journal* 4: 621–632.
  48. Postgate JR (1998) *The origins of the unit of nitrogen fixation* University of Sussex: Cambridge University Press.
  49. Dietz KJ (2003) Plant peroxiredoxins. *Annual Review of Plant Biology* 54: 93–107.
  50. Veal EA, Findlay VJ, Day AM, Bozonet SM, Evans JM, et al. (2004) A 2-Cys peroxiredoxin regulates peroxide-induced oxidation and activation of a stress-activated MAP kinase. *Molecular Cell* 15: 129–139.
  51. Shi T, Sun Y, Falkowski PG (2007) Effects of iron limitation on the expression of metabolic genes in the marine cyanobacterium *Trichodesmium erythraeum* IMS101. *Environmental Microbiology* 9: 2945–2956.
  52. Beardall J, Giordano M (2002) Ecological implications of microalgal and cyanobacterial CO<sub>2</sub> concentrating mechanisms, and their regulation. *Functional Plant Biology* 29: 335–347.
  53. Woodger FJ, Bryant DA, Price GD (2007) Transcriptional regulation of the CO<sub>2</sub>-concentrating mechanism in a euryhaline, coastal marine cyanobacterium, *Synechococcus* sp strain PCC 7002: Role of NdhR/CcmR. *Journal of Bacteriology* 189: 3335–3347.
  54. Kaneko T, Matsubayashi T, Sugita M, Sugiura M (1996) Physical and gene maps of the unicellular cyanobacterium *Synechococcus* sp strain PCC6301 genome. *Plant Molecular Biology* 31: 193–201.
  55. Price GD, Sultemeyer D, Klughammer B, Ludwig M, Badger MR (1998) The functioning of the CO<sub>2</sub> concentrating mechanism in several cyanobacterial strains: a review of general physiological characteristics, genes, proteins, and recent advances. *Canadian Journal of Botany-Revue Canadienne De Botanique* 76: 973–1002.
  56. Kaplan A, Reinhold L (1999) CO<sub>2</sub> concentrating mechanisms in photosynthetic microorganisms. *Annual Review of Plant Physiology and Plant Molecular Biology* 50: 539–570.
  57. Sultemeyer D, Klughammer B, Badger MR, Price GD (1998) Fast induction of high-affinity HCO<sub>3</sub><sup>-</sup> transport in cyanobacteria. *Plant Physiology* 116: 183–192.
  58. Mulholland MR, Ohki K, Capone DG (1999) Nitrogen utilization and metabolism relative to patterns of N<sub>2</sub> fixation in cultures of *Trichodesmium* NIBB1067. *Journal of Phycology* 35: 977–988.
  59. Wyman M, Zehr JP, Capone DG (1996) Temporal variability in nitrogenase gene expression in natural populations of the marine cyanobacterium *Trichodesmium thiebautii*. *Applied and Environmental Microbiology* 62: 1073–1075.
